# Supplementary material for: Unraveling the unfolded protein response signature: implications for tumor immune microenvironment heterogeneity and clinical prognosis in stomach cancer
Source: publisher site journal article supplement (doi:10.18632/aging.205784), 2024-05-02
Supplement: Supplementary file [file aging-v16i9-205784-supplementary-material-SD1.pdf]

## SUPPLEMENTARY TABLES

**Supplementary Table 1. Clinical information of patients with stomach cancer in this study.**

| <b>Cohort</b>                            | <b>TCGA</b> | <b>GSE13861</b> | <b>GSE28541</b> |
|------------------------------------------|-------------|-----------------|-----------------|
| <b>Number of patients</b>                | n=375       | n=60            | n=40            |
| <b>Age (Mean±SD)</b>                     | 65.83±10.65 | 60.87±11.78     | 58.40±13.06     |
| <b>Follow up time (Mean±SD) (months)</b> | 18.84±17.90 | 65.73±32.75     | 24.58±24.73     |
| <b>Follow up status</b>                  |             |                 |                 |
| Alive                                    | 228 (60.8%) | 34 (56.7%)      | 8 (20.0%)       |
| Dead                                     | 147 (39.2%) | 26 (43.3%)      | 32 (80.0%)      |
| <b>Gender</b>                            |             |                 |                 |
| Male                                     | 241 (64.3%) | 42 (70.0%)      | 27 (67.5%)      |
| Female                                   | 134 (35.7%) | 18 (30.0%)      | 13 (32.5%)      |
| <b>Clinical stage</b>                    |             |                 |                 |
| Stage I                                  | 53 (14.1%)  | -               | 1 (2.5%)        |
| Stage II                                 | 111 (29.6%) | -               | 6 (15%)         |
| Stage III                                | 150 (40.0%) | -               | 12 (30.0%)      |
| Stage IV                                 | 38 (10.1%)  | -               | 21 (52.5%)      |
| Unknown                                  | 23 (6.1%)   | -               | -               |
| <b>Grade</b>                             |             |                 |                 |
| G1                                       | 10 (2.7%)   | -               | -               |
| G2                                       | 137 (36.5%) | -               | -               |
| G3                                       | 219 (58.4%) | -               | -               |
| GX                                       | 9 (2.4%)    | -               | -               |
| <b>T stage</b>                           |             |                 |                 |
| T1                                       | 19 (5.1%)   | -               | -               |
| T2                                       | 80 (21.3%)  | -               | -               |
| T3                                       | 168 (44.8%) | -               | -               |
| T4                                       | 100 (26.7%) | -               | -               |
| TX                                       | 8 (2.1%)    | -               | -               |
| Unknown                                  | -           | -               | -               |
| <b>M stage</b>                           |             |                 |                 |
| M0                                       | 330 (88.0%) | 52 (86.6%)      | -               |
| M1                                       | 25 (6.7%)   | 4 (6.7%)        | -               |
| MX                                       | 20 (5.3%)   | -               | -               |
| Unknown                                  | -           | 4 (6.7%)        | -               |
| <b>N stage</b>                           |             |                 |                 |
| N0                                       | 111 (29.6%) | -               | -               |
| N1                                       | 97 (25.9%)  | -               | -               |
| N2                                       | 75 (20.0%)  | -               | -               |
| N3                                       | 74 (19.7%)  | -               | -               |
| NX                                       | 16 (4.3%)   | -               | -               |
| Unknown                                  | 2 (0.5%)    | -               | -               |

**Supplementary Table 2. Summary of primers of each gene.**

| <b>id</b> | <b>Primer</b> | <b>direction</b> | <b>Sequence (5' &gt; 3')</b>  |
|-----------|---------------|------------------|-------------------------------|
| EIF4E     | Forward       | primer           | 5'-GAAACCACCCCTACTCCTAATCC-3' |
|           | Reverse       | primer           | 5'-AGAGTGCCCATCTGTTCTGTA-3'   |
| EXOSC1    | Forward       | primer           | 5'-GCACAGTCCAACCTACCTGCT-3'   |
|           | Reverse       | primer           | 5'-GTGTGGGTCTTAGGGCACTG-3'    |
| IARS1     | Forward       | primer           | 5'-TTGCACCGCATCTCTGAAGT-3'    |
|           | Reverse       | primer           | 5'-TGCCCTCGGCAATGAAATCT-3'    |
| IGFBP1    | Forward       | primer           | 5'-AGGCACAGGAGACATCAGGA-3'    |
|           | Reverse       | primer           | 5'-CCATTCCAAGGGTAGACGCA-3'    |
| SPCS1     | Forward       | primer           | 5'-ATCTACGGGTACGTGGCTGA-3'    |
|           | Reverse       | primer           | 5'-AACCACCTGAGAGGATGCCG-3'    |
| TSPYL2    | Forward       | primer           | 5'-CCCAGAGGCTGACAGGATTG-3'    |
|           | Reverse       | primer           | 5'-CTCACATCTGCCCTGGTTT-3'     |
| TUBB2A    | Forward       | primer           | 5'-CGCGCACCGCTCCGA-3'         |
|           | Reverse       | primer           | 5'-CTGATGACCTCCCAAACCTGGGC-3' |
| β-actin   | Forward       | primer           | 5'-GGACCTGACTGACTACCTCAT-3'   |
|           | Reverse       | primer           | 5'-CGTAGCACAGCTTCTCCTAAT-3'   |

**Supplementary Table 3. The sequence of siIGFBP1.**

| <b>id</b>  | <b>Sequence (5' &gt; 3')</b> |
|------------|------------------------------|
| siCTL      | 5'-CCUAAGGUUAAGUCGCCCUCG-3'  |
| siIGFBP1-1 | 5'-CAGGAGAAGAAUUUCCAAAU-3'   |
| siIGFBP1-2 | 5'-CCUGGAUAAUUUCCAUCUGAU-3'  |

siCTL, siRNA control.
